# Supplementary material for: DNA barcoding for bio-surveillance of emerging pests and species identification in Afrotropical Prioninae (Coleoptera, Cerambycidae)
Source: Biodivers Data J. 2021 Apr 28;9:e64499. doi: 10.3897/BDJ.9.e64499 (PMC8099841; doi:10.3897/BDJ.9.e64499)
Supplement: Supplementary material 3 — Detailed genetic distance table at species level [file bdj-09-e64499-s003.xls]

Closterus rothschildi	COLMA033-19	Closterus rothschildi	COLMA025-19	Closterus rothschildi	0.0
Cacosceles oedipus	PRIAF008-20	Cacosceles oedipus	PRIAF005-20	Cacosceles oedipus	11.431446
Cacosceles newmannii	PRIAF003-20	Cacosceles newmannii	PRIAF002-20	Cacosceles newmannii	4.6292033
Cacosceles newmannii	PRIAF004-20	Cacosceles newmannii	PRIAF002-20	Cacosceles newmannii	4.6292033
Cacosceles newmannii	PRIAF004-20	Cacosceles newmannii	PRIAF003-20	Cacosceles newmannii	0.0
Cacosceles newmannii	PRIAF006-20	Cacosceles newmannii	PRIAF002-20	Cacosceles newmannii	0.0
Cacosceles newmannii	PRIAF006-20	Cacosceles newmannii	PRIAF003-20	Cacosceles newmannii	4.6292033
Cacosceles newmannii	PRIAF006-20	Cacosceles newmannii	PRIAF004-20	Cacosceles newmannii	4.6292033
Cacosceles newmannii	PRIAF007-20	Cacosceles newmannii	PRIAF002-20	Cacosceles newmannii	0.0
Cacosceles newmannii	PRIAF007-20	Cacosceles newmannii	PRIAF003-20	Cacosceles newmannii	4.6292033
Cacosceles newmannii	PRIAF007-20	Cacosceles newmannii	PRIAF004-20	Cacosceles newmannii	4.6292033
Cacosceles newmannii	PRIAF007-20	Cacosceles newmannii	PRIAF006-20	Cacosceles newmannii	0.0
Cacosceles newmannii	PRIAF038-20	Cacosceles newmannii	PRIAF002-20	Cacosceles newmannii	4.6292033
Cacosceles newmannii	PRIAF038-20	Cacosceles newmannii	PRIAF003-20	Cacosceles newmannii	0.0
Cacosceles newmannii	PRIAF038-20	Cacosceles newmannii	PRIAF004-20	Cacosceles newmannii	0.0
Cacosceles newmannii	PRIAF038-20	Cacosceles newmannii	PRIAF006-20	Cacosceles newmannii	4.6292033
Cacosceles newmannii	PRIAF038-20	Cacosceles newmannii	PRIAF007-20	Cacosceles newmannii	4.6292033
Cacosceles newmannii	PRIAF039-20	Cacosceles newmannii	PRIAF002-20	Cacosceles newmannii	0.0
Cacosceles newmannii	PRIAF039-20	Cacosceles newmannii	PRIAF003-20	Cacosceles newmannii	4.6292033
Cacosceles newmannii	PRIAF039-20	Cacosceles newmannii	PRIAF004-20	Cacosceles newmannii	4.6292033
Cacosceles newmannii	PRIAF039-20	Cacosceles newmannii	PRIAF006-20	Cacosceles newmannii	0.0
Cacosceles newmannii	PRIAF039-20	Cacosceles newmannii	PRIAF007-20	Cacosceles newmannii	0.0
Cacosceles newmannii	PRIAF039-20	Cacosceles newmannii	PRIAF038-20	Cacosceles newmannii	4.6292033
Cacosceles newmannii	PRIAF040-20	Cacosceles newmannii	PRIAF002-20	Cacosceles newmannii	0.0
Cacosceles newmannii	PRIAF040-20	Cacosceles newmannii	PRIAF003-20	Cacosceles newmannii	4.6292033
Cacosceles newmannii	PRIAF040-20	Cacosceles newmannii	PRIAF004-20	Cacosceles newmannii	4.6292033
Cacosceles newmannii	PRIAF040-20	Cacosceles newmannii	PRIAF006-20	Cacosceles newmannii	0.0
Cacosceles newmannii	PRIAF040-20	Cacosceles newmannii	PRIAF007-20	Cacosceles newmannii	0.0
Cacosceles newmannii	PRIAF040-20	Cacosceles newmannii	PRIAF038-20	Cacosceles newmannii	4.6292033
Cacosceles newmannii	PRIAF040-20	Cacosceles newmannii	PRIAF039-20	Cacosceles newmannii	0.0
Cacosceles newmannii	PRIAF041-20	Cacosceles newmannii	PRIAF002-20	Cacosceles newmannii	0.0
Cacosceles newmannii	PRIAF041-20	Cacosceles newmannii	PRIAF003-20	Cacosceles newmannii	4.6292033
Cacosceles newmannii	PRIAF041-20	Cacosceles newmannii	PRIAF004-20	Cacosceles newmannii	4.6292033
Cacosceles newmannii	PRIAF041-20	Cacosceles newmannii	PRIAF006-20	Cacosceles newmannii	0.0
Cacosceles newmannii	PRIAF041-20	Cacosceles newmannii	PRIAF007-20	Cacosceles newmannii	0.0
Cacosceles newmannii	PRIAF041-20	Cacosceles newmannii	PRIAF038-20	Cacosceles newmannii	4.6292033
Cacosceles newmannii	PRIAF041-20	Cacosceles newmannii	PRIAF039-20	Cacosceles newmannii	0.0
Cacosceles newmannii	PRIAF041-20	Cacosceles newmannii	PRIAF040-20	Cacosceles newmannii	0.0
Cacosceles newmannii	PRIAF042-20	Cacosceles newmannii	PRIAF002-20	Cacosceles newmannii	0.0
Cacosceles newmannii	PRIAF042-20	Cacosceles newmannii	PRIAF003-20	Cacosceles newmannii	4.6292033
Cacosceles newmannii	PRIAF042-20	Cacosceles newmannii	PRIAF004-20	Cacosceles newmannii	4.6292033
Cacosceles newmannii	PRIAF042-20	Cacosceles newmannii	PRIAF006-20	Cacosceles newmannii	0.0
Cacosceles newmannii	PRIAF042-20	Cacosceles newmannii	PRIAF007-20	Cacosceles newmannii	0.0
Cacosceles newmannii	PRIAF042-20	Cacosceles newmannii	PRIAF038-20	Cacosceles newmannii	4.6292033
Cacosceles newmannii	PRIAF042-20	Cacosceles newmannii	PRIAF039-20	Cacosceles newmannii	0.0
Cacosceles newmannii	PRIAF042-20	Cacosceles newmannii	PRIAF040-20	Cacosceles newmannii	0.0
Cacosceles newmannii	PRIAF042-20	Cacosceles newmannii	PRIAF041-20	Cacosceles newmannii	0.0
Cacosceles newmannii	PRIAF043-20	Cacosceles newmannii	PRIAF002-20	Cacosceles newmannii	0.15313807
Cacosceles newmannii	PRIAF043-20	Cacosceles newmannii	PRIAF003-20	Cacosceles newmannii	4.7967067
Cacosceles newmannii	PRIAF043-20	Cacosceles newmannii	PRIAF004-20	Cacosceles newmannii	4.7967067
Cacosceles newmannii	PRIAF043-20	Cacosceles newmannii	PRIAF006-20	Cacosceles newmannii	0.15313807
Cacosceles newmannii	PRIAF043-20	Cacosceles newmannii	PRIAF007-20	Cacosceles newmannii	0.15313807
Cacosceles newmannii	PRIAF043-20	Cacosceles newmannii	PRIAF038-20	Cacosceles newmannii	4.7967067
Cacosceles newmannii	PRIAF043-20	Cacosceles newmannii	PRIAF039-20	Cacosceles newmannii	0.15313807
Cacosceles newmannii	PRIAF043-20	Cacosceles newmannii	PRIAF040-20	Cacosceles newmannii	0.15313807
Cacosceles newmannii	PRIAF043-20	Cacosceles newmannii	PRIAF041-20	Cacosceles newmannii	0.15313807
Cacosceles newmannii	PRIAF043-20	Cacosceles newmannii	PRIAF042-20	Cacosceles newmannii	0.15313807
Cacosceles newmannii	PRIAF044-20	Cacosceles newmannii	PRIAF002-20	Cacosceles newmannii	0.0
Cacosceles newmannii	PRIAF044-20	Cacosceles newmannii	PRIAF003-20	Cacosceles newmannii	4.6292033
Cacosceles newmannii	PRIAF044-20	Cacosceles newmannii	PRIAF004-20	Cacosceles newmannii	4.6292033
Cacosceles newmannii	PRIAF044-20	Cacosceles newmannii	PRIAF006-20	Cacosceles newmannii	0.0
Cacosceles newmannii	PRIAF044-20	Cacosceles newmannii	PRIAF007-20	Cacosceles newmannii	0.0
Cacosceles newmannii	PRIAF044-20	Cacosceles newmannii	PRIAF038-20	Cacosceles newmannii	4.6292033
Cacosceles newmannii	PRIAF044-20	Cacosceles newmannii	PRIAF039-20	Cacosceles newmannii	0.0
Cacosceles newmannii	PRIAF044-20	Cacosceles newmannii	PRIAF040-20	Cacosceles newmannii	0.0
Cacosceles newmannii	PRIAF044-20	Cacosceles newmannii	PRIAF041-20	Cacosceles newmannii	0.0
Cacosceles newmannii	PRIAF044-20	Cacosceles newmannii	PRIAF042-20	Cacosceles newmannii	0.0
Cacosceles newmannii	PRIAF044-20	Cacosceles newmannii	PRIAF043-20	Cacosceles newmannii	0.15313807
Cacosceles newmannii	PRIAF045-20	Cacosceles newmannii	PRIAF002-20	Cacosceles newmannii	0.15313807
Cacosceles newmannii	PRIAF045-20	Cacosceles newmannii	PRIAF003-20	Cacosceles newmannii	4.462256
Cacosceles newmannii	PRIAF045-20	Cacosceles newmannii	PRIAF004-20	Cacosceles newmannii	4.462256
Cacosceles newmannii	PRIAF045-20	Cacosceles newmannii	PRIAF006-20	Cacosceles newmannii	0.15313807
Cacosceles newmannii	PRIAF045-20	Cacosceles newmannii	PRIAF007-20	Cacosceles newmannii	0.15313807
Cacosceles newmannii	PRIAF045-20	Cacosceles newmannii	PRIAF038-20	Cacosceles newmannii	4.462256
Cacosceles newmannii	PRIAF045-20	Cacosceles newmannii	PRIAF039-20	Cacosceles newmannii	0.15313807
Cacosceles newmannii	PRIAF045-20	Cacosceles newmannii	PRIAF040-20	Cacosceles newmannii	0.15313807
Cacosceles newmannii	PRIAF045-20	Cacosceles newmannii	PRIAF041-20	Cacosceles newmannii	0.15313807
Cacosceles newmannii	PRIAF045-20	Cacosceles newmannii	PRIAF042-20	Cacosceles newmannii	0.15313807
Cacosceles newmannii	PRIAF045-20	Cacosceles newmannii	PRIAF043-20	Cacosceles newmannii	0.3067496
Cacosceles newmannii	PRIAF045-20	Cacosceles newmannii	PRIAF044-20	Cacosceles newmannii	0.15313807
Cacosceles newmannii	PRIAF046-20	Cacosceles newmannii	PRIAF002-20	Cacosceles newmannii	0.0
Cacosceles newmannii	PRIAF046-20	Cacosceles newmannii	PRIAF003-20	Cacosceles newmannii	4.6292033
Cacosceles newmannii	PRIAF046-20	Cacosceles newmannii	PRIAF004-20	Cacosceles newmannii	4.6292033
Cacosceles newmannii	PRIAF046-20	Cacosceles newmannii	PRIAF006-20	Cacosceles newmannii	0.0
Cacosceles newmannii	PRIAF046-20	Cacosceles newmannii	PRIAF007-20	Cacosceles newmannii	0.0
Cacosceles newmannii	PRIAF046-20	Cacosceles newmannii	PRIAF038-20	Cacosceles newmannii	4.6292033
Cacosceles newmannii	PRIAF046-20	Cacosceles newmannii	PRIAF039-20	Cacosceles newmannii	0.0
Cacosceles newmannii	PRIAF046-20	Cacosceles newmannii	PRIAF040-20	Cacosceles newmannii	0.0
Cacosceles newmannii	PRIAF046-20	Cacosceles newmannii	PRIAF041-20	Cacosceles newmannii	0.0
Cacosceles newmannii	PRIAF046-20	Cacosceles newmannii	PRIAF042-20	Cacosceles newmannii	0.0
Cacosceles newmannii	PRIAF046-20	Cacosceles newmannii	PRIAF043-20	Cacosceles newmannii	0.15313807
Cacosceles newmannii	PRIAF046-20	Cacosceles newmannii	PRIAF044-20	Cacosceles newmannii	0.0
Cacosceles newmannii	PRIAF046-20	Cacosceles newmannii	PRIAF045-20	Cacosceles newmannii	0.15313807
Cacosceles newmannii	PRIAF047-20	Cacosceles newmannii	PRIAF002-20	Cacosceles newmannii	4.6292033
Cacosceles newmannii	PRIAF047-20	Cacosceles newmannii	PRIAF003-20	Cacosceles newmannii	0.0
Cacosceles newmannii	PRIAF047-20	Cacosceles newmannii	PRIAF004-20	Cacosceles newmannii	0.0
Cacosceles newmannii	PRIAF047-20	Cacosceles newmannii	PRIAF006-20	Cacosceles newmannii	4.6292033
Cacosceles newmannii	PRIAF047-20	Cacosceles newmannii	PRIAF007-20	Cacosceles newmannii	4.6292033
Cacosceles newmannii	PRIAF047-20	Cacosceles newmannii	PRIAF038-20	Cacosceles newmannii	0.0
Cacosceles newmannii	PRIAF047-20	Cacosceles newmannii	PRIAF039-20	Cacosceles newmannii	4.6292033
Cacosceles newmannii	PRIAF047-20	Cacosceles newmannii	PRIAF040-20	Cacosceles newmannii	4.6292033
Cacosceles newmannii	PRIAF047-20	Cacosceles newmannii	PRIAF041-20	Cacosceles newmannii	4.6292033
Cacosceles newmannii	PRIAF047-20	Cacosceles newmannii	PRIAF042-20	Cacosceles newmannii	4.6292033
Cacosceles newmannii	PRIAF047-20	Cacosceles newmannii	PRIAF043-20	Cacosceles newmannii	4.7967067
Cacosceles newmannii	PRIAF047-20	Cacosceles newmannii	PRIAF044-20	Cacosceles newmannii	4.6292033
Cacosceles newmannii	PRIAF047-20	Cacosceles newmannii	PRIAF045-20	Cacosceles newmannii	4.462256
Cacosceles newmannii	PRIAF047-20	Cacosceles newmannii	PRIAF046-20	Cacosceles newmannii	4.6292033
Cacosceles newmannii	PRIAF048-20	Cacosceles newmannii	PRIAF002-20	Cacosceles newmannii	0.0
Cacosceles newmannii	PRIAF048-20	Cacosceles newmannii	PRIAF003-20	Cacosceles newmannii	4.6292033
Cacosceles newmannii	PRIAF048-20	Cacosceles newmannii	PRIAF004-20	Cacosceles newmannii	4.6292033
Cacosceles newmannii	PRIAF048-20	Cacosceles newmannii	PRIAF006-20	Cacosceles newmannii	0.0
Cacosceles newmannii	PRIAF048-20	Cacosceles newmannii	PRIAF007-20	Cacosceles newmannii	0.0
Cacosceles newmannii	PRIAF048-20	Cacosceles newmannii	PRIAF038-20	Cacosceles newmannii	4.6292033
Cacosceles newmannii	PRIAF048-20	Cacosceles newmannii	PRIAF039-20	Cacosceles newmannii	0.0
Cacosceles newmannii	PRIAF048-20	Cacosceles newmannii	PRIAF040-20	Cacosceles newmannii	0.0
Cacosceles newmannii	PRIAF048-20	Cacosceles newmannii	PRIAF041-20	Cacosceles newmannii	0.0
Cacosceles newmannii	PRIAF048-20	Cacosceles newmannii	PRIAF042-20	Cacosceles newmannii	0.0
Cacosceles newmannii	PRIAF048-20	Cacosceles newmannii	PRIAF043-20	Cacosceles newmannii	0.15313807
Cacosceles newmannii	PRIAF048-20	Cacosceles newmannii	PRIAF044-20	Cacosceles newmannii	0.0
Cacosceles newmannii	PRIAF048-20	Cacosceles newmannii	PRIAF045-20	Cacosceles newmannii	0.15313807
Cacosceles newmannii	PRIAF048-20	Cacosceles newmannii	PRIAF046-20	Cacosceles newmannii	0.0
Cacosceles newmannii	PRIAF048-20	Cacosceles newmannii	PRIAF047-20	Cacosceles newmannii	4.6292033
Cacosceles newmannii	PRIAF049-20	Cacosceles newmannii	PRIAF002-20	Cacosceles newmannii	0.0
Cacosceles newmannii	PRIAF049-20	Cacosceles newmannii	PRIAF003-20	Cacosceles newmannii	4.6292033
Cacosceles newmannii	PRIAF049-20	Cacosceles newmannii	PRIAF004-20	Cacosceles newmannii	4.6292033
Cacosceles newmannii	PRIAF049-20	Cacosceles newmannii	PRIAF006-20	Cacosceles newmannii	0.0
Cacosceles newmannii	PRIAF049-20	Cacosceles newmannii	PRIAF007-20	Cacosceles newmannii	0.0
Cacosceles newmannii	PRIAF049-20	Cacosceles newmannii	PRIAF038-20	Cacosceles newmannii	4.6292033
Cacosceles newmannii	PRIAF049-20	Cacosceles newmannii	PRIAF039-20	Cacosceles newmannii	0.0
Cacosceles newmannii	PRIAF049-20	Cacosceles newmannii	PRIAF040-20	Cacosceles newmannii	0.0
Cacosceles newmannii	PRIAF049-20	Cacosceles newmannii	PRIAF041-20	Cacosceles newmannii	0.0
Cacosceles newmannii	PRIAF049-20	Cacosceles newmannii	PRIAF042-20	Cacosceles newmannii	0.0
Cacosceles newmannii	PRIAF049-20	Cacosceles newmannii	PRIAF043-20	Cacosceles newmannii	0.15313807
Cacosceles newmannii	PRIAF049-20	Cacosceles newmannii	PRIAF044-20	Cacosceles newmannii	0.0
Cacosceles newmannii	PRIAF049-20	Cacosceles newmannii	PRIAF045-20	Cacosceles newmannii	0.15313807
Cacosceles newmannii	PRIAF049-20	Cacosceles newmannii	PRIAF046-20	Cacosceles newmannii	0.0
Cacosceles newmannii	PRIAF049-20	Cacosceles newmannii	PRIAF047-20	Cacosceles newmannii	4.6292033
Cacosceles newmannii	PRIAF049-20	Cacosceles newmannii	PRIAF048-20	Cacosceles newmannii	0.0
Cacosceles newmannii	PRIAF050-20	Cacosceles newmannii	PRIAF002-20	Cacosceles newmannii	0.0
Cacosceles newmannii	PRIAF050-20	Cacosceles newmannii	PRIAF003-20	Cacosceles newmannii	4.6292033
Cacosceles newmannii	PRIAF050-20	Cacosceles newmannii	PRIAF004-20	Cacosceles newmannii	4.6292033
Cacosceles newmannii	PRIAF050-20	Cacosceles newmannii	PRIAF006-20	Cacosceles newmannii	0.0
Cacosceles newmannii	PRIAF050-20	Cacosceles newmannii	PRIAF007-20	Cacosceles newmannii	0.0
Cacosceles newmannii	PRIAF050-20	Cacosceles newmannii	PRIAF038-20	Cacosceles newmannii	4.6292033
Cacosceles newmannii	PRIAF050-20	Cacosceles newmannii	PRIAF039-20	Cacosceles newmannii	0.0
Cacosceles newmannii	PRIAF050-20	Cacosceles newmannii	PRIAF040-20	Cacosceles newmannii	0.0
Cacosceles newmannii	PRIAF050-20	Cacosceles newmannii	PRIAF041-20	Cacosceles newmannii	0.0
Cacosceles newmannii	PRIAF050-20	Cacosceles newmannii	PRIAF042-20	Cacosceles newmannii	0.0
Cacosceles newmannii	PRIAF050-20	Cacosceles newmannii	PRIAF043-20	Cacosceles newmannii	0.15313807
Cacosceles newmannii	PRIAF050-20	Cacosceles newmannii	PRIAF044-20	Cacosceles newmannii	0.0
Cacosceles newmannii	PRIAF050-20	Cacosceles newmannii	PRIAF045-20	Cacosceles newmannii	0.15313807
Cacosceles newmannii	PRIAF050-20	Cacosceles newmannii	PRIAF046-20	Cacosceles newmannii	0.0
Cacosceles newmannii	PRIAF050-20	Cacosceles newmannii	PRIAF047-20	Cacosceles newmannii	4.6292033
Cacosceles newmannii	PRIAF050-20	Cacosceles newmannii	PRIAF048-20	Cacosceles newmannii	0.0
Cacosceles newmannii	PRIAF050-20	Cacosceles newmannii	PRIAF049-20	Cacosceles newmannii	0.0
Cacosceles newmannii	PRIAF052-20	Cacosceles newmannii	PRIAF002-20	Cacosceles newmannii	0.0
Cacosceles newmannii	PRIAF052-20	Cacosceles newmannii	PRIAF003-20	Cacosceles newmannii	4.6292033
Cacosceles newmannii	PRIAF052-20	Cacosceles newmannii	PRIAF004-20	Cacosceles newmannii	4.6292033
Cacosceles newmannii	PRIAF052-20	Cacosceles newmannii	PRIAF006-20	Cacosceles newmannii	0.0
Cacosceles newmannii	PRIAF052-20	Cacosceles newmannii	PRIAF007-20	Cacosceles newmannii	0.0
Cacosceles newmannii	PRIAF052-20	Cacosceles newmannii	PRIAF038-20	Cacosceles newmannii	4.6292033
Cacosceles newmannii	PRIAF052-20	Cacosceles newmannii	PRIAF039-20	Cacosceles newmannii	0.0
Cacosceles newmannii	PRIAF052-20	Cacosceles newmannii	PRIAF040-20	Cacosceles newmannii	0.0
Cacosceles newmannii	PRIAF052-20	Cacosceles newmannii	PRIAF041-20	Cacosceles newmannii	0.0
Cacosceles newmannii	PRIAF052-20	Cacosceles newmannii	PRIAF042-20	Cacosceles newmannii	0.0
Cacosceles newmannii	PRIAF052-20	Cacosceles newmannii	PRIAF043-20	Cacosceles newmannii	0.15313807
Cacosceles newmannii	PRIAF052-20	Cacosceles newmannii	PRIAF044-20	Cacosceles newmannii	0.0
Cacosceles newmannii	PRIAF052-20	Cacosceles newmannii	PRIAF045-20	Cacosceles newmannii	0.15313807
Cacosceles newmannii	PRIAF052-20	Cacosceles newmannii	PRIAF046-20	Cacosceles newmannii	0.0
Cacosceles newmannii	PRIAF052-20	Cacosceles newmannii	PRIAF047-20	Cacosceles newmannii	4.6292033
Cacosceles newmannii	PRIAF052-20	Cacosceles newmannii	PRIAF048-20	Cacosceles newmannii	0.0
Cacosceles newmannii	PRIAF052-20	Cacosceles newmannii	PRIAF049-20	Cacosceles newmannii	0.0
Cacosceles newmannii	PRIAF052-20	Cacosceles newmannii	PRIAF050-20	Cacosceles newmannii	0.0
Cacosceles newmannii	PRIAF053-20	Cacosceles newmannii	PRIAF002-20	Cacosceles newmannii	0.0
Cacosceles newmannii	PRIAF053-20	Cacosceles newmannii	PRIAF003-20	Cacosceles newmannii	4.6292033
Cacosceles newmannii	PRIAF053-20	Cacosceles newmannii	PRIAF004-20	Cacosceles newmannii	4.6292033
Cacosceles newmannii	PRIAF053-20	Cacosceles newmannii	PRIAF006-20	Cacosceles newmannii	0.0
Cacosceles newmannii	PRIAF053-20	Cacosceles newmannii	PRIAF007-20	Cacosceles newmannii	0.0
Cacosceles newmannii	PRIAF053-20	Cacosceles newmannii	PRIAF038-20	Cacosceles newmannii	4.6292033
Cacosceles newmannii	PRIAF053-20	Cacosceles newmannii	PRIAF039-20	Cacosceles newmannii	0.0
Cacosceles newmannii	PRIAF053-20	Cacosceles newmannii	PRIAF040-20	Cacosceles newmannii	0.0
Cacosceles newmannii	PRIAF053-20	Cacosceles newmannii	PRIAF041-20	Cacosceles newmannii	0.0
Cacosceles newmannii	PRIAF053-20	Cacosceles newmannii	PRIAF042-20	Cacosceles newmannii	0.0
Cacosceles newmannii	PRIAF053-20	Cacosceles newmannii	PRIAF043-20	Cacosceles newmannii	0.15313807
Cacosceles newmannii	PRIAF053-20	Cacosceles newmannii	PRIAF044-20	Cacosceles newmannii	0.0
Cacosceles newmannii	PRIAF053-20	Cacosceles newmannii	PRIAF045-20	Cacosceles newmannii	0.15313807
Cacosceles newmannii	PRIAF053-20	Cacosceles newmannii	PRIAF046-20	Cacosceles newmannii	0.0
Cacosceles newmannii	PRIAF053-20	Cacosceles newmannii	PRIAF047-20	Cacosceles newmannii	4.6292033
Cacosceles newmannii	PRIAF053-20	Cacosceles newmannii	PRIAF048-20	Cacosceles newmannii	0.0
Cacosceles newmannii	PRIAF053-20	Cacosceles newmannii	PRIAF049-20	Cacosceles newmannii	0.0
Cacosceles newmannii	PRIAF053-20	Cacosceles newmannii	PRIAF050-20	Cacosceles newmannii	0.0
Cacosceles newmannii	PRIAF053-20	Cacosceles newmannii	PRIAF052-20	Cacosceles newmannii	0.0
Cacosceles newmannii	PRIAF054-20	Cacosceles newmannii	PRIAF002-20	Cacosceles newmannii	0.0
Cacosceles newmannii	PRIAF054-20	Cacosceles newmannii	PRIAF003-20	Cacosceles newmannii	4.6292033
Cacosceles newmannii	PRIAF054-20	Cacosceles newmannii	PRIAF004-20	Cacosceles newmannii	4.6292033
Cacosceles newmannii	PRIAF054-20	Cacosceles newmannii	PRIAF006-20	Cacosceles newmannii	0.0
Cacosceles newmannii	PRIAF054-20	Cacosceles newmannii	PRIAF007-20	Cacosceles newmannii	0.0
Cacosceles newmannii	PRIAF054-20	Cacosceles newmannii	PRIAF038-20	Cacosceles newmannii	4.6292033
Cacosceles newmannii	PRIAF054-20	Cacosceles newmannii	PRIAF039-20	Cacosceles newmannii	0.0
Cacosceles newmannii	PRIAF054-20	Cacosceles newmannii	PRIAF040-20	Cacosceles newmannii	0.0
Cacosceles newmannii	PRIAF054-20	Cacosceles newmannii	PRIAF041-20	Cacosceles newmannii	0.0
Cacosceles newmannii	PRIAF054-20	Cacosceles newmannii	PRIAF042-20	Cacosceles newmannii	0.0
Cacosceles newmannii	PRIAF054-20	Cacosceles newmannii	PRIAF043-20	Cacosceles newmannii	0.15313807
Cacosceles newmannii	PRIAF054-20	Cacosceles newmannii	PRIAF044-20	Cacosceles newmannii	0.0
Cacosceles newmannii	PRIAF054-20	Cacosceles newmannii	PRIAF045-20	Cacosceles newmannii	0.15313807
Cacosceles newmannii	PRIAF054-20	Cacosceles newmannii	PRIAF046-20	Cacosceles newmannii	0.0
Cacosceles newmannii	PRIAF054-20	Cacosceles newmannii	PRIAF047-20	Cacosceles newmannii	4.6292033
Cacosceles newmannii	PRIAF054-20	Cacosceles newmannii	PRIAF048-20	Cacosceles newmannii	0.0
Cacosceles newmannii	PRIAF054-20	Cacosceles newmannii	PRIAF049-20	Cacosceles newmannii	0.0
Cacosceles newmannii	PRIAF054-20	Cacosceles newmannii	PRIAF050-20	Cacosceles newmannii	0.0
Cacosceles newmannii	PRIAF054-20	Cacosceles newmannii	PRIAF052-20	Cacosceles newmannii	0.0
Cacosceles newmannii	PRIAF054-20	Cacosceles newmannii	PRIAF053-20	Cacosceles newmannii	0.0
Macrotoma palmata	PRIAF023-20	Macrotoma palmata	PRIAF021-20	Macrotoma palmata	0.0
Erioderus kolbei	PRIAF016-20	Erioderus kolbei	PRIAF014-20	Erioderus kolbei	0.9259529
Mallodon downesi	ARGAB8964-19	Mallodon downesi	BGABB1184-14	Mallodon downesi	6.875144
Mallodon downesi	PRIAF032-20	Mallodon downesi	BGABB1184-14	Mallodon downesi	11.683173
Mallodon downesi	PRIAF032-20	Mallodon downesi	ARGAB8964-19	Mallodon downesi	12.110384
Mallodon downesi	PRIAF033-20	Mallodon downesi	BGABB1184-14	Mallodon downesi	11.3706665
Mallodon downesi	PRIAF033-20	Mallodon downesi	ARGAB8964-19	Mallodon downesi	12.3768215
Mallodon downesi	PRIAF033-20	Mallodon downesi	PRIAF032-20	Mallodon downesi	5.5992656
Mallodon downesi	PRIAF034-20	Mallodon downesi	BGABB1184-14	Mallodon downesi	11.509536
Mallodon downesi	PRIAF034-20	Mallodon downesi	ARGAB8964-19	Mallodon downesi	11.93502
Mallodon downesi	PRIAF034-20	Mallodon downesi	PRIAF032-20	Mallodon downesi	0.46030214
Mallodon downesi	PRIAF034-20	Mallodon downesi	PRIAF033-20	Mallodon downesi	5.436628
Mallodon downesi	PRIAF035-20	Mallodon downesi	BGABB1184-14	Mallodon downesi	12.897806
Mallodon downesi	PRIAF035-20	Mallodon downesi	ARGAB8964-19	Mallodon downesi	14.342204
Mallodon downesi	PRIAF035-20	Mallodon downesi	PRIAF032-20	Mallodon downesi	7.483624
Mallodon downesi	PRIAF035-20	Mallodon downesi	PRIAF033-20	Mallodon downesi	3.3136904
Mallodon downesi	PRIAF035-20	Mallodon downesi	PRIAF034-20	Mallodon downesi	7.317645
Tersec infans	BGABA638-14	Tersec infans	BGABA637-14	Tersec infans	0.0
Anomotoma wilwerthi	ARGAB8965-19	Anomotoma wilwerthi	ARGAB8962-19	Anomotoma wilwerthi	1.8753953
Anomotoma wilwerthi	ARGAB8967-19	Anomotoma wilwerthi	ARGAB8962-19	Anomotoma wilwerthi	1.8753953
Anomotoma wilwerthi	ARGAB8967-19	Anomotoma wilwerthi	ARGAB8965-19	Anomotoma wilwerthi	0.0
Trichophysis obscura	PRIAF036-20	Trichophysis obscura	COLMA022-19	Trichophysis obscura	1.4019605
