# Supplementary material for: DNA barcoding for bio-surveillance of emerging pests and species identification in Afrotropical Prioninae (Coleoptera, Cerambycidae)
Source: Biodivers Data J. 2021 Apr 28;9:e64499. doi: 10.3897/BDJ.9.e64499 (PMC8099841; doi:10.3897/BDJ.9.e64499)
Supplement: Supplementary material 5 — Summary statistics for specimens included in this study. BIN Average: average intraspecific distance within BIN; BIN Dmax = maxim intraspecific distance within a BIN; Dmin_NN heterospecific = minimum distance to nearest neighbour; NN= nearest neighbour. [file bdj-09-e64499-s005.xlsx]

## Sheet: Statistics
Summary statistics for specimens included in this study. BIN Average: average intraspecific distance within BIN; BIN Dmax= maxim intraspecific distance within a BIN; Dmin_NN heterospecific = minimum distance to nearest neighbor; NN= nearest neighbor.
Tribe	Species	Named species	one BIN/one named species match	N in dataset	N in BIN	Species with multiple BINs (N of bIns)	Number of BINS within species	BIN name	BIN geography	BIN Average (P-distance)	BIN Dmax (P-distance)	Dmin_NN heterospecific (P-distance)	NN_heterospecific_BIN	NN_heterospecific_Identification
Acanthophorini	Tithoes maculatus	1	1	1	2			BOLD:AAC9054	Gabon, Cameroon	1.11	1.11	7.63	BOLD:AAC9057	Tithoes hassoni
Acanthophorini	Anthracocentrus capensis	1	1	1	2			BOLD:AAW6169	Angola, South Africa	2.09	2.09	2.25	BOLD:ACK8992	Tithoes
Acanthophorini	Ceratocentrus spinicornis	1		1	21	1	2	BOLD:AAE9822	Gabon, Democratic Republic of the Congo, Republic of the Congo, Uganda, Malawi, Tanzania	0.84	1.79	2.89	BOLD:ABA2123	Ceratocentrus spinicornis
Cacoscelini	Notophysis sp.	1		1	2			BOLD:AEE3155	South Africa	1.85	1.85	16.78	BOLD:ACM2500	Euderces nelsoni
Cacoscelini	Notophysis caffra	1		1	1			BOLD:AEH1149	South Africa
Cacoscelini	Cacosceles oedipus	1		1	1	1	2	BOLD:AEF3198	South Africa	NA	NA	10.75	BOLD:AEF3199	Cacosceles oedipus
Cacoscelini	Cacosceles oedipus			1	1			BOLD:AEF3199	South Africa	NA	NA	10.75	BOLD:AEF3198	Cacosceles oedipus
Cacoscelini	Cacosceles sp.			1	1			BOLD:AEF3200	South Africa	NA	NA	12.52	BOLD:AEF6074	Cacosceles newmannii
Cacoscelini	Cacosceles newmannii	1		17	17	1	2	BOLD:AEF3555	South Africa	0	0	4.65	BOLD:AEF6074	Cacosceles newmannii
Cacoscelini	Cacosceles newmannii			4	4			BOLD:AEF6074	South Africa	0	0	4.65	BOLD:AEF3555	Cacosceles newmannii
Closterini	Closterus sp.			2	2			BOLD:AEC6031	Madagascar	0	0	13.64	BOLD:AEC4900	Closterus sp
Closterini	Closterus sp.			1	3			BOLD:AEC3377	Madagascar	1.61	1.61	14.13	BOLD:AEC6031	Closterus rothschildi
Closterini	Closterus sp.			1	1			BOLD:AEC4900	Madagascar	NA	NA	3.64	BOLD:AEC6031	Closterus sp.
Closterini	Closterus rothschildi	1	1	2	2			BOLD:AEC6031	Madagascar	0	0	13.64	BOLD:AEC4900	Closterus sp.
Closterini	Closterus sp.			1	1			BOLD:AEF5847	Madagascar	NA	NA	14.61	BOLD:AEC3377	Closterus sp.
Macrotomini	Macrotoma palmata	1	1	2	5			BOLD:AAB9640	South Africa	0.31	0.64	9.12	BOLD:AAB9643	Macrotoma hassoni
Macrotomini	Macrotoma serripes	1	1	1	8			BOLD:AAC6501	Gabon, Democratic Republic of the Congo, Uganda, Angola	1.77	3.05	10.11	BOLD:AAC6503	Macrotoma prionopus
Macrotomini	Macrotoma natala	1		1	8	1	2	BOLD:AAD4378	South Africa, Democratic Republic of the Congo, Uganda, Malawi	0.56	0.96	6.43	BOLD:AAD4379	Macrotoma natala
Macrotomini	Erioderus kolbei	1	1	2	4			BOLD:ADI8207	South Africa, Malawi	0.94	1.28	13.35	BOLD:ADL6139	Erioderus sp.
Macrotomini	Erioderus sp.			1	1			BOLD:ADL6139	South Africa	NA	NA	6.23	BOLD:ADL7354	Erioderus sp.
Macrotomini	Erioderus sp.			1	1			BOLD:ADL7354	South Africa	NA	NA	6.23	BOLD:ADL6139	Erioderus sp.
Macrotomini	Leiophysis dujardini	1	1	1	1			BOLD:AEC4901	Madagascar	NA	NA	18.14	BOLD:ABY2815	Scatopyrodes beltii
Macrotomini	Trichophysis obscura	1	1	2	2			BOLD:AEC4904	Madagascar	1.44	1.44	8.99	BOLD:AEF3018	Paramacrotoma
Macrotomini	Trichophysis sp.			1	1			BOLD:AEF3018	Madagascar	NA	NA	8.99	BOLD:AEC4904	Trichophysis obscura
Macrotomini	Erioderus hirtus	1		1	1	1	2	BOLD:AEF2651	South Africa	NA	NA	4.19	BOLD:ADI7813	Erioderus hirtus
Macrotomini	Anomotoma wilwerthi	1		1	4	1	2	BOLD:AAF0771	Gabon	0.93	1.61	1.03	BOLD:AEC5096	Anomotoma
Macrotomini	Anomotoma wilwerthi			2	2			BOLD:AEC5096	Gabon	0	0	1.03	BOLD:AAF0771	Anomotoma wilwerthi
Macrotomini	Tersec infans	1	1	2	8			BOLD:AAI0837	Gabon, Democratic Republic of the Congo, Republic of the Congo	0.21	0.38	7.89	BOLD:AAF2030	Tersec ergatoides
Macrotomini	Paramacrotoma scabridorsis	1	1	2	2			BOLD:AAK5052	South Africa	0.36	0.36	10.59	BOLD:ABU7211	Macrotoma sp.
Macrotomini	Macrotoma sp			1	1			BOLD:AEF3308	Madagascar	NA	NA	17.34	BOLD:ADR6780	Callipogon relictus
Macrotomini	Phlyctenosis micros	1	1	1	1			BOLD:AEF0775	South Africa	NA	NA	6.45	BOLD:ADR2693	Guedesia sp.
Macrotomini	Phlyctenosis sp.			1	1			BOLD:AEC2460	Madagascar	NA	NA	6.88	BOLD:AAH9052	Phlyctenosis mirabilis
Mallodontini	Mallodon downesi	1		1	3	1	5	BOLD:AAK7439	Gabon, Republic of the Congo	0.61	0.92	2.57	BOLD:ADM7277	Mallodon downesi
Mallodontini	Mallodon downesi			1	1			BOLD:AEC4905	Gabon	NA	NA	5.94	BOLD:AAK7439	Mallodon downesi
Mallodontini	Mallodon downesi			2	2			BOLD:AEF4128	South Africa	0.48	0.48	5.3	BOLD:AEF4130	Mallodon downesi
Mallodontini	Mallodon downesi			1	1			BOLD:AEF4129	South Africa	NA	NA	3.21	BOLD:AEF4130	Mallodon downesi
Mallodontini	Mallodon downesi			1	1			BOLD:AEF4130	South Africa	NA	NA	3.21	BOLD:AEF4129	Mallodon downesi
Meroscelisini	Delocheilus sp			1	2			BOLD:ADL7871	South Africa	0.36	0.36	8.67	BOLD:AEF4803	Delocheilus sp
Meroscelisini	Delocheilus sp			1	1			BOLD:AEF4803	South Africa	NA	NA	8.67	BOLD:ADL7871	Delocheilus sp
Meroscelisini	Delocheilus sp			2	2			BOLD:AEF4805	South Africa	0.16	0.16	15.41	BOLD:AEF3198	Cacosceles oedipus
Meroscelisini	Delocheilus sp			1	1			BOLD:AEF4806	South Africa	NA	NA	13.64	BOLD:ADL7871	Delocheilus sp
TOTAL		20	11	70	126	7	2.42857
AVERAGE				1.70732
